# Supplementary material for: MYC sensitises cells to apoptosis by driving energetic demand
Source: PubMed Central journal article supplement (PMC9363429; doi:10.1038/s41467-022-32368-z), 2022-08-09

## Supplementary Figure 1. Gating strategy and confirmation of apoptosis in MRC-5 and Eμ-Myc lymphoma cells

Referring to Figure 1. **(a)** Gating strategy for all annexin V/PI apoptosis assays measured by flow cytometry. **(b)** MRC-5 cells overexpressing MYC-ER<sup>T2</sup> (Myc) or MYC-ER<sup>T2</sup> and Bcl-xL (Myc/Bcl-xL) were stimulated for 24 h with 200nM 4-OHT and glutamine was then withdrawn for 16 h. Apoptosis was assessed by annexinV/PI staining. **(c)** Annexin V/PI was used to quantify apoptosis in Eμ-Myc lymphoma cells in complete medium (+Gln) or following glutamine withdrawal for 16 h (-Gln). **(d)** Low magnification phase contrast images of VEC and MYC cultures after 24 h of glutamine withdrawal, after 24 h withdrawal and 24 h addback of glutamine and after 24 h withdrawal and 96 h addback of glutamine.

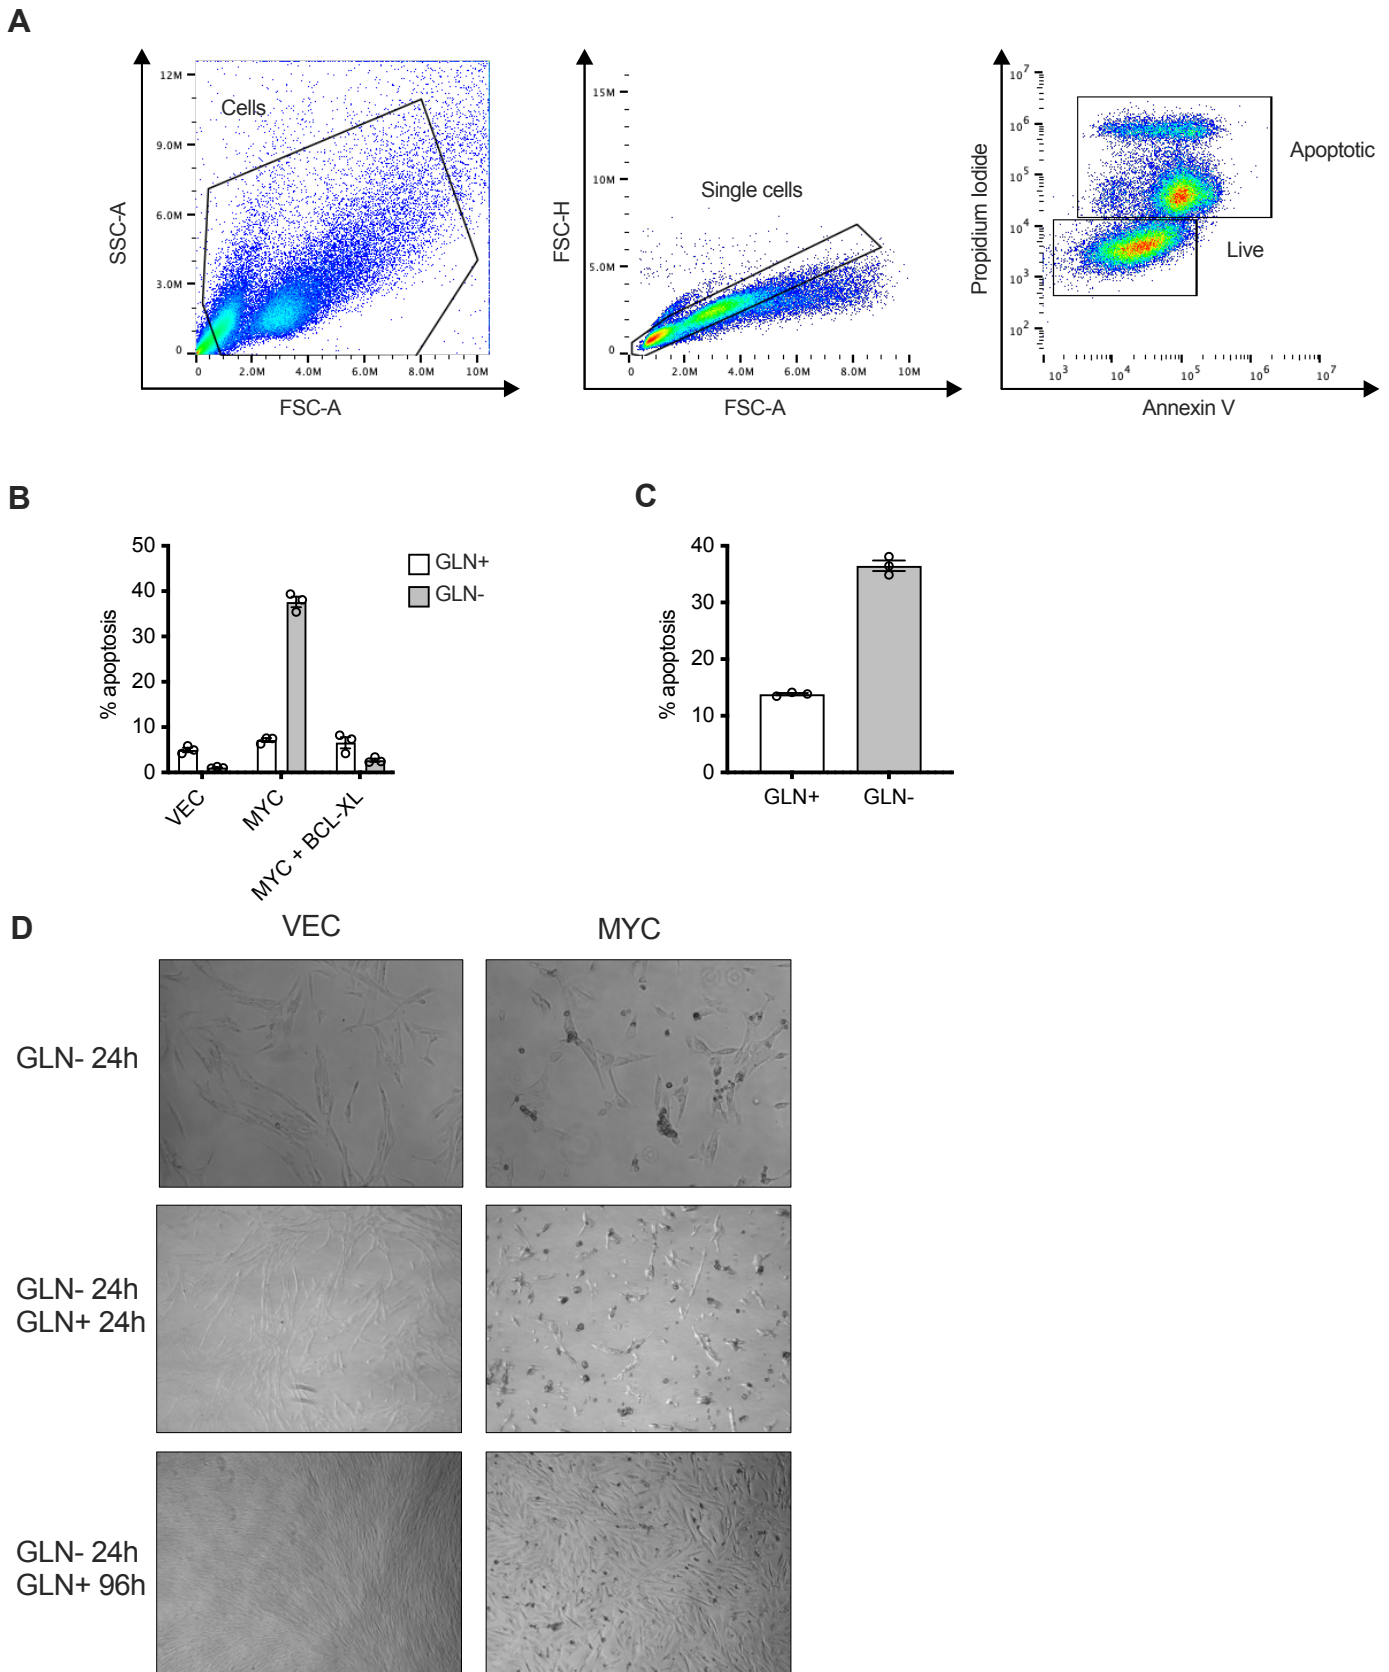

## Supplementary Figure 2. Untargeted stable isotope tracing in MYC-expressing cells

Referring to Figure 2. Untargeted X13CMS analysis compared stable isotope incorporation in MRC-5 primary human fibroblasts with active MYC to empty vector control. Figure summarizes X13CMS analysis 'hits', which were defined as metabolites with significantly increased percent label incorporation ( $p \leq 0.05$ , T-test) from a 6 hr  $^{13}\text{C}_6$ -glucose pulse (blue boxes) or a 6 hr  $^{15}\text{N}$ -amide-glutamine pulse (red boxes). Further targeted analyses were carried out on pathways containing hits to identify metabolites that may have been missed from the initial analysis (highlighted in blue for  $^{13}\text{C}_6$ -glucose and orange for  $^{15}\text{N}$ -amide-glutamine).

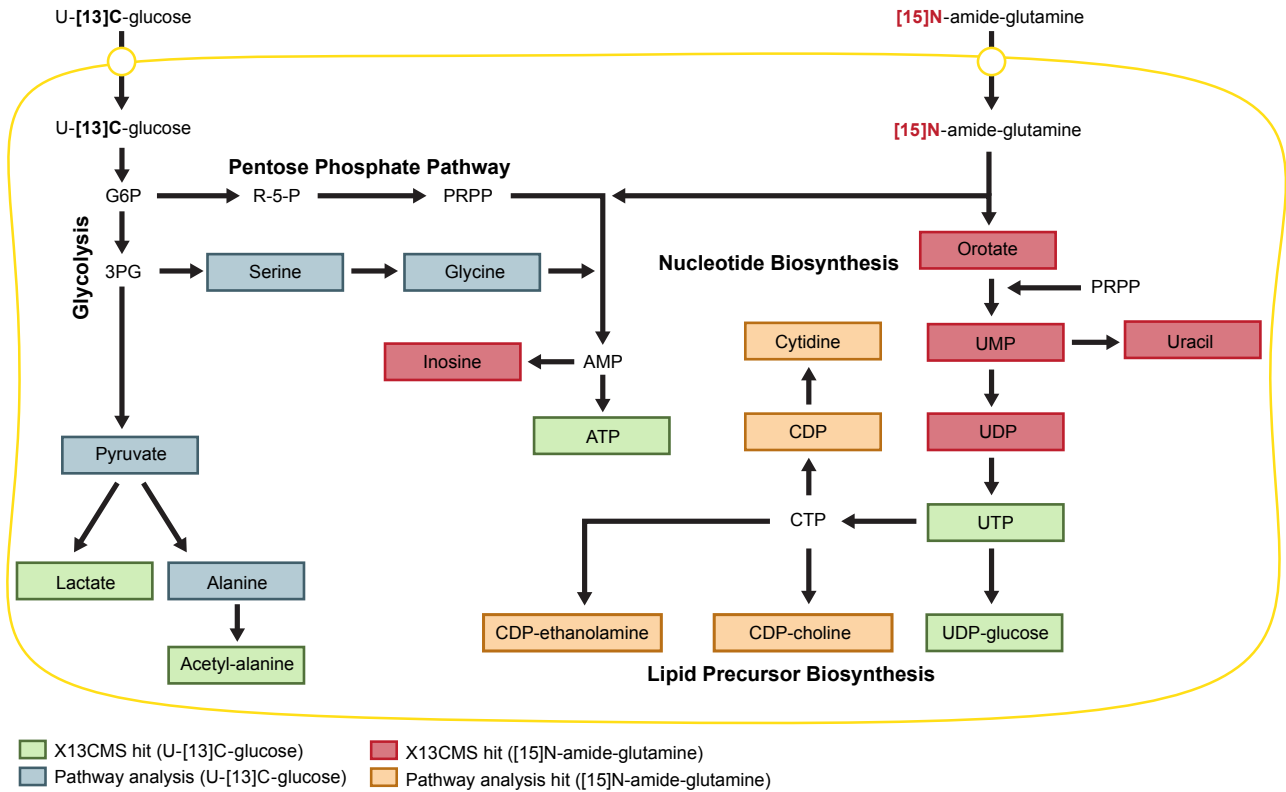

**Supplementary Table 1.** Untargeted X13CMS analysis of U-<sup>13</sup>C-glucose incorporation

Referring to Figure 2. Untargeted X13CMS analysis compared stable isotope incorporation in MRC-5 primary human fibroblasts with active MYC to empty vector control. Table shows X13CMS analysis 'hits', which were defined as metabolites with significantly increased percent label incorporation ( $p \leq 0.05$ , T-test) from a 6 hr <sup>13</sup>C<sub>6</sub>-glucose pulse.

| <b>X13CMS hits</b>                      |                          |       |         |
|-----------------------------------------|--------------------------|-------|---------|
| <i>Increased in Myc</i>                 |                          |       |         |
| Metabolites                             | Predominant isotopologue | Ratio | p-value |
| Lactic acid                             | M+3                      | 1.5   | 0.002   |
| Acetyl-alanine                          | M+5                      | 2.0   | 0.000   |
| Glutamic acid                           | M+2                      | 1.5   | 0.001   |
| Acetyl-glutamic acid                    | M+2                      | 11.7  | 0.000   |
| Acety-methionine                        | M+2                      | 1.2   | 0.000   |
| Uridine triphosphate                    | M+5                      | 1.2   | 0.001   |
| Adenosine triphosphate                  | M+6                      | 1.2   | 0.000   |
| Uridine disphosphate-glucose            | M+11                     | 1.1   | 0.000   |
| <i>Decreased in Myc</i>                 |                          |       |         |
| Acetyl-aspartyl-glutamic acid           | M+11                     | 10.57 | 0.000   |
| <b>Normalised X13CMS hits</b>           |                          |       |         |
| <i>Increased in Myc</i>                 |                          |       |         |
| Metabolites                             | Predominant isotopologue | Ratio | p-value |
| Lactic acid                             | M+3                      | 1.4   | 0.010   |
| Acetyl-alanine                          | M+5                      | 1.9   | 0.000   |
| Glutamic acid                           | M+2                      | 1.5   | 0.004   |
| Acetyl-glutamic acid                    | M+2                      | 3.0   | 0.000   |
| Acety-methionine                        | M+2                      | 1.2   | 0.000   |
| Uridine triphosphate                    | M+5                      | 1.1   | 0.000   |
| Adenosine triphosphate                  | M+6                      | 1.2   | 0.000   |
| Uridine disphosphate-glucose            | M+11                     | 1.1   | 0.000   |
| <i>Decreased in Myc</i>                 |                          |       |         |
| Acetyl-aspartyl-glutamic acid           | M+11                     | 5.62  | 0.000   |
| <b>Normalised pathway analysis hits</b> |                          |       |         |
| <i>Increased in Myc</i>                 |                          |       |         |
| Metabolites                             | Predominant isotopologue | Ratio | p-value |
| Pyruvic acid                            | M+3                      | 1.3   | 0.000   |
| Alanine                                 | M+3                      | 1.5   | 0.000   |
| Glycine                                 | M+2                      | 6.0   | 0.000   |
| Serine                                  | M+3                      | 4.2   | 0.000   |

**Supplementary Table 2.** Untargeted X13CMS analysis of <sup>15</sup>N-glutamine incorporation

Referring to Figure 2. Untargeted X13CMS analysis compared stable isotope incorporation in MRC-5 primary human fibroblasts with active MYC to empty vector control. Table shows X13CMS analysis 'hits', which were defined as metabolites with significantly increased percent label incorporation ( $p \leq 0.05$ , T-test) from a 6 hr <sup>15</sup>N-amide-glutamine pulse.

| <b>X13CMS hits</b>                      |                          |                     |         |
|-----------------------------------------|--------------------------|---------------------|---------|
| Metabolites                             | Predominant isotopologue | Ratio               | p-value |
| Uracil                                  | M+1                      | Inf. (0 in control) |         |
| Orotic acid                             | M+1                      | Inf. (0 in control) |         |
| Cys-Gly                                 | M+1                      | Inf. (0 in control) |         |
| Inosine                                 | M+1                      | Inf. (0 in control) |         |
| Uridine monophosphate                   | M+1                      | Inf. (0 in control) |         |
| Uridine diphosphate                     | M+1                      | Inf. (0 in control) |         |
| Uridine diphosphate-acetyl-glucosamine  | M+1                      | 1.2                 | 0.033   |
| <b>Normalised X13CMS hits</b>           |                          |                     |         |
| Metabolites                             | Predominant isotopologue | Ratio               | p-value |
| Uracil                                  | M+1                      | 29.5                | 0.000   |
| Orotic acid                             | M+1                      | 2.1                 | 0.005   |
| Cys-Gly                                 | M+1                      | Inf. (0 in control) |         |
| Inosine                                 | M+1                      | Inf. (0 in control) |         |
| Uridine monophosphate                   | M+1                      | Inf. (0 in control) |         |
| Uridine diphosphate                     | M+1                      | 3.3                 | 0.000   |
| Uridine diphosphate-acetyl-glucosamine  | M+1                      | 1.2                 | 0.000   |
| <b>Normalised pathway analysis hits</b> |                          |                     |         |
| Metabolites                             | Predominant isotopologue | Ratio               | p-value |
| Uridine triphosphate                    | M+1                      | 1.5                 | 0.000   |
| Cytidine diphosphate                    | M+1                      | Inf. (0 in control) |         |
| Cytidine                                | M+1                      | 10.9                | 0.000   |
| Cytidine diphosphate-choline            | M+1                      | Inf. (0 in control) |         |
| Uridine diphosphate-glucose             | M+1                      | 2.3                 | 0.000   |
| Cytidine diphosphate-ethanolamine       | M+1                      | 10.2                | 0.000   |

**Supplementary Figure 3.** The energetic effects of PPP inhibition occur prior to onset of apoptosis

Referring to Figure 3. **(a)** Ratio of peak intensities of ATP/AMP of VEC and MYC cells upon glutamine withdrawal for one hour. **(b)** Ratio of peak intensities of ATP/AMP of MYC cells upon inhibition of the PPP with 250  $\mu$ M 6-AN for 2 hours with glutamine withdrawal for the second hour.

**A**

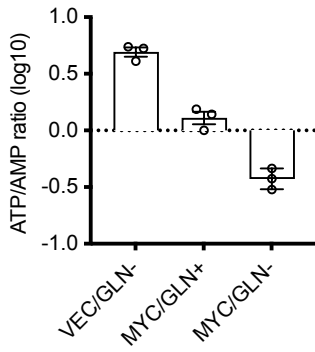

**B**

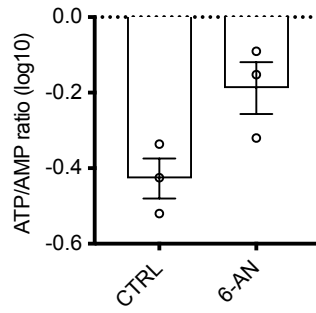

**Supplementary Figure 4.** MYC does not drive reductive carboxylation in MRC-5 fibroblasts

Referring to Figure 5. Isotopologue analysis of citrate following a  $^{13}\text{C}_5$ -glutamine pulse shows minimal reductive carboxylation compared to oxidative TCA cycling in MRC-5 VEC versus MYC cells.

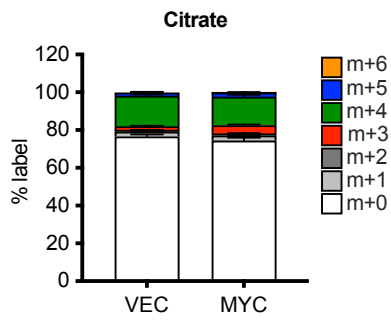

**Supplementary Figure 5.** Kinetics and succinate rescue of apoptosis triggered by CPI-613

Referring to Figure 5. **(a)** Kinetics of Incucyte caspase 3/7 analysis of MRC-5 cells triggered to undergo apoptosis by CPI-613. **(b)** Rescue of the apoptosis triggered by CPI-613 by addition of 4 mM dimethylsuccinate.

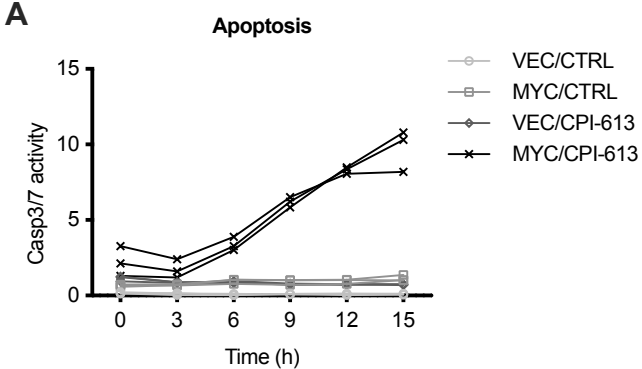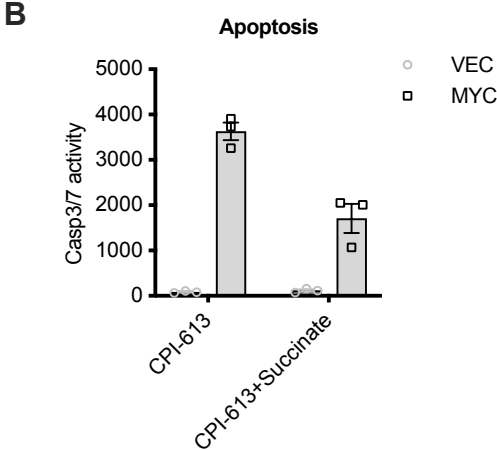

### Supplementary Figure 6. Genetic manipulation of AK2 and ASNS

Referring to Figure 6. **(a)** qRT-PCR analysis of expression of *ASNS* (normalised to *GAPDH* mRNA) upon *ASNS* knockdown in MYC MRC-5 cells. Expression relative to VEC siNT is shown. **(b)** qRT-PCR analysis of expression of *AK2* (normalised to  $\beta$ -actin mRNA) upon *AK2* knockdown (siAK2) or non-targeting control (siNT) in MRC-5 cells expressing MYC-ER<sup>T2</sup>. Expression relative to siNT is shown. **(c)** Incucyte caspase 3/7 apoptosis assay in MYC cells with control siRNA (siNT) or siRNA to *AK2* (siAK2) in medium containing glutamine or after 8 h of glutamine withdrawal. **(d)** qRT-PCR analysis of expression of *AK2* (normalised to *GAPDH* mRNA) upon overexpression of *AK2* cDNA.

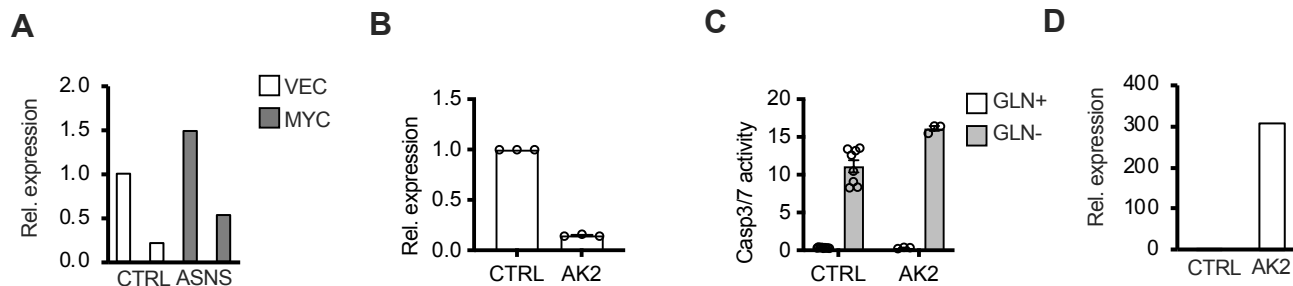

Supplement: 41467_2022_32368_MOESM1_ESM.pdf [file 41467_2022_32368_MOESM1_ESM.pdf]
